1 **TITLE PAGE**

2 Synchronous Group-Based Tele-Exercise versus Community-Based Interventions:  
3 Effects on Physical Functioning and Adherence in Older Adults at Risk of Falls - A  
4 Randomized Controlled Trial

5 Karly O. W. CHAN<sup>1\*</sup>, Peter P. YUEN<sup>1</sup>, Ben Y.F. FONG<sup>1</sup>, Vincent T.S. LAW<sup>1</sup>, Fowie  
6 S.F. NG<sup>2</sup>, Janet L.C. Lee<sup>3</sup>, I.S. CHEUNG<sup>1</sup>, Tommy K.C. Ng<sup>1</sup>, Wilson C.P. FUNG<sup>4</sup>,

7

8 <sup>1</sup>College of Professional and Continuing Education, The Hong Kong Polytechnic  
9 University, Hong Kong SAR, China

10 <sup>2</sup>School of Management, Tung Wah College, Hong Kong SAR, China

11 <sup>3</sup>Department of Rehabilitation Sciences, The Hong Kong Polytechnic University,  
12 Hong Kong SAR, China

13 <sup>4</sup>Hong Kong Telemedicine Association, Hong Kong SAR, China

14

15 **\* Correspondence:**

16 Karly O.W. CHAN

17 [karly.chan@cpce-polyu.edu.hk](mailto:karly.chan@cpce-polyu.edu.hk)

18 College of Professional and Continuing Education, The Hong Kong Polytechnic  
19 University,

20 PolyU Hung Hom Bay Campus,

21 8 Hung Lok Road, Hung Hom, Kowloon, Hong Kong

22

23 **Email address of each author:**

24 Karly O.W. CHAN: [karly.chan@cpce-polyu.edu.hk](mailto:karly.chan@cpce-polyu.edu.hk)

25 Peter P. YUEN: [mspeter@cpce-polyu.edu.hk](mailto:mspeter@cpce-polyu.edu.hk)

26 Ben Y.F. FONG: [ben.fong@cpce-polyu.edu.hk](mailto:ben.fong@cpce-polyu.edu.hk)

27 Vincent T.S. LAW: [vincent.law@cpce-polyu.edu.hk](mailto:vincent.law@cpce-polyu.edu.hk)

28 Fowie S.F. NG: [fowieng@twc.edu.hk](mailto:fowieng@twc.edu.hk)

29 Janet L.C. Lee: [lcjlee@polyu.edu.hk](mailto:lcjlee@polyu.edu.hk)

30 I.S. CHEUNG: [isan.cheung@cpce-polyu.edu.hk](mailto:isan.cheung@cpce-polyu.edu.hk)

31 Tommy K.C. Ng: [tommy.ng@cpce-polyu.edu.hk](mailto:tommy.ng@cpce-polyu.edu.hk)

32 **NOTE:** This preprint reports new research that has not been certified by peer review and should not be used to guide clinical practice.

Wilson C.P. FUNG: [wilsonmg@gmail.com](mailto:wilsonmg@gmail.com)

1 **SYNCHRONOUS GROUP-BASED TELE-EXERCISE VERSUS**  
2 **COMMUNITY-BASED INTERVENTIONS: EFFECTS ON**  
3 **PHYSICAL FUNCTIONING AND ADHERENCE IN OLDER**  
4 **ADULTS AT RISK OF FALLS - A RANDOMIZED CONTROLLED**  
5 **TRIAL**

6 **ABSTRACT**

7 **Objective** This study aimed to assess the effectiveness of synchronous group-based  
8 tele-exercise (TE) in improving physical functioning and exercise adherence among  
9 older adults at risk of falls, comparing it to a community-based group (CB).

10 **Methods**

11 91 community-dwelling older adults at risk of falls were recruited from 10 community  
12 centres in Hong Kong. Participants were randomly assigned to either the TE or CB  
13 group based on their community centre. Both groups received modified Otago exercise  
14 training for three months, with the difference in the mode of delivery (tele-exercise at  
15 home or face-to-face at a community centre). The primary outcomes assessed Fall  
16 Efficacy Scale (FES-I), 6-meter walk test, Timed Up and Go test (TUG), Berg Balance  
17 Scale (BBS), Functional Reach Test (FRT), Appendicular Skeletal Muscle Mass Index  
18 (ASMI) and percentage of body fat. Secondary outcomes included exercise adherence,  
19 dropout rate, and Physical Activity Enjoyment Scale (PACES). The primary analysis  
20 was conducted using a modified intention-to-treat approach, utilizing all available data.

21 **Results**

22 Both groups showed significant improvements in FES-I, 6-meter walk test, TUG, and  
23 BBS over time ( $p < 0.05$ ). High adherence rates (TE: 85%; CB: 90%), low dropout rates  
24 (TE: 4.4%; CB: 0%), and high PACES scores (TE:  $108.6 \pm 9.3$ ; CB:  $108.2 \pm 7.9$ ) were  
25 observed in both groups. TE and CB were comparable in most outcomes at baseline  
26 and at three months ( $p > 0.05$ ). No serious adverse events were reported.

27

28 **Conclusions**

29 The findings revealed synchronous group-based tele-exercise training demonstrated  
30 comparable effectiveness to face-to-face community training in terms of physical  
31 functioning, adherence, and enjoyment.

32

33 **Trial registration number** ChiCTR2200063370

34 **Keywords:** synchronous tele-exercise, falls, older adults, exercise adherence,

35

1 **SYNCHRONOUS GROUP-BASED TELE-EXERCISE VERSUS**  
2 **COMMUNITY-BASED INTERVENTIONS: EFFECTS ON**  
3 **PHYSICAL FUNCTIONING AND ADHERENCE IN OLDER**  
4 **ADULTS AT RISK OF FALLS - A RANDOMIZED CONTROLLED**  
5 **TRIAL**

6

7 **SUMMARY BOX**

8 What is already known on this topic -

- 9
- 10 • Community-based exercise programme has been proven effective in reducing the risk of falls and preventing fall-related injuries.
  - 11 • Tele-exercise presents a viable solution to address the challenges faced by community-dwelling older adults at risk of falls such as limited exercise space in the community and travel constraints.
  - 12 • Currently, there is a plethora of published studies on the effectiveness of tele-exercise. However, these studies are primarily small-scale, non-randomized, pilot feasibility studies, resulting in a generally low-to-moderate methodological quality of evidence.
- 13  
14  
15  
16  
17

18 What this study adds -

- 19
- 20 • This is the first rigorously designed RCT with sufficient statistical power to investigate the effectiveness of the tele-exercise group compared with the community-based group.
  - 21 • Synchronous group-based tele-exercise training demonstrated comparable effectiveness to face-to-face community training in terms of physical functioning, adherence, and enjoyment.
  - 22 • Tele-exercise training proved to be safe, feasible and enjoyable for older adults at risk of falls, including those with diverse age ranges (65-91), educational backgrounds, and technological proficiency.
- 23  
24  
25  
26  
27

28 How this study might affect research, practice or policy -

- 29
- 30 • Incorporating well-designed tele-exercise programmes with professional support and technical assistance is crucial to effectively engage older adults, promote their physical functions, improve exercise adherence and reduce the risk of falls.
  - 31 • These findings will inform future research on tele-exercise interventions, guide the implementation of tele-exercise programmes in practice, and influence policy decisions regarding the application of tele-exercise for older adults at risk of falls.
- 32  
33  
34  
35  
36

37

## 1 INTRODUCTION

2 Falls among older people are a significant concern, with a global prevalence of 26.5%.<sup>1</sup>  
3 Falls can lead to substantial costs, ranging from 2,044 to 25,955 USD per fall victim,  
4 1,059 to 10,913 USD per fall event, and 5,654 to 42,840 USD per fall-related  
5 hospitalization.<sup>2</sup> Hospitalizations due to falls are five times more common than those  
6 resulting from other injuries.<sup>3</sup> Falls also have adverse consequences such as hip  
7 fractures, rehospitalization, extended hospital stays, and increased mortality rates.<sup>4 5</sup>  
8 Therefore, implementing preventive strategies is vital in mitigating age-related  
9 impairments and promoting independence in older adults.

10 Traditional exercise interventions have shown promise in reducing fall risk and  
11 preventing fall-related injuries.<sup>6</sup> However, older adults face significant challenges due  
12 to limited exercise space in the community and travel constraints,<sup>7</sup> especially for those  
13 who are susceptible to falls. To address these challenges, tele-exercise has emerged as  
14 a viable alternative. Tele-exercise encompasses various forms, including video, audio,  
15 or text communication technologies, delivered synchronously or asynchronously.<sup>8 9</sup>  
16 Chan, *et al*<sup>10</sup> reported promising results in reducing falls among community-dwelling  
17 older adults through telehealth combined with exercise interventions and highlighted  
18 the safety, feasibility, and acceptability of telehealth interventions. The presence of real-  
19 time guidance and supervision of video conferencing-based online exercise  
20 programmes was found to be highly beneficial for older adults.<sup>7</sup> Granet, *et al*<sup>11</sup>  
21 demonstrated that a higher ratio of live training resulted in greater improvements in  
22 muscle function and a lower drop-out rate compared to a higher ratio of recorded  
23 sessions, emphasizing the relevance of synchronous delivery of tele-exercise.

24 The existing studies on synchronous tele-exercise for community dwelling older adults  
25 and older adults at risk of falls have limitations. They predominantly focused on older  
26 adults who already had an internet connection and the necessary devices for online  
27 exercise programmes as inclusion criteria.<sup>11-13</sup> Granet, *et al*<sup>11</sup> noted that the study  
28 samples were highly educated, with over 67% of participants having attained a  
29 university level of education, which may limit the generalizability of the results to the  
30 broader population. In addition, the lack of proper sample size estimation in some  
31 studies also highlights the need for improved study quality.<sup>11 13</sup>

32 In a recent systematic review conducted by Gamble, *et al*<sup>8</sup>, the methodological quality  
33 of the evidence from 26 randomized controlled trials about the effectiveness of  
34 telerehabilitation such as tele-exercise for community dwelling older adults was  
35 critiqued. Among the included trials, five<sup>14</sup> specifically targeted older adults with an  
36 increased risk of falls.<sup>13-17</sup> It is noteworthy that four of these studies<sup>13 14 16 17</sup> exhibited  
37 a high risk of bias based on the revised Cochrane Risk-of-Bias 2 tool,<sup>18</sup> emphasizing  
38 the necessity for more rigorous and controlled investigations in this particular field.  
39 Interestingly, only two of these studies incorporated a videoconferencing setup<sup>13 14</sup>,  
40 which is an essential component of synchronous tele-exercise.

41 Therefore, the aim of the current study was to address these methodological limitations  
42 by investigating the effectiveness of synchronous tele-exercise (TE) on physical  
43 functioning and exercise adherence among community-dwelling older adults at risk of  
44 falls in comparison with a community-based group (CB).

## 1 **METHODS**

### 2 **Study design**

3 This was a 3-month single-blind, randomized controlled trial (RCT) comparing  
4 synchronous group-based tele-exercise training (TE) with face-to-face community-  
5 based exercise training (CB) for community-dwelling older people at risk of falls. More  
6 detailed information, including details of the outcome measures and intrinsic  
7 differences between the two groups, can be obtained from our study protocol.<sup>19</sup>  
8 Reporting follows the CONSORT 2010 statement.<sup>20</sup>

9

### 10 **Research ethics**

11 Approval for the study was granted by the Ethics Committee of the College of  
12 Professional and Continuing Education (RC/ETH/H/0029). The study was registered in  
13 the Chinese Clinical Trial Registry (ChiCTR2200063370) on 5 September 2022. In  
14 accordance with the WMA declaration of Helsinki, informed consent was obtained from  
15 all participants.

16

### 17 **Sample size calculation**

18 Sample size calculations were conducted using G\*Power software, assuming an effect  
19 size of 0.367 based on a previous study by Benavent-Caballer, *et al*<sup>21</sup> that focused on  
20 the Time Up and Go Test. With a confidence level of 95%, a power of 80%, and an  
21 estimated attrition rate of 20% (including mortality)<sup>22</sup>, a minimum sample size of 92  
22 participants was determined to be necessary.

23

### 24 **Participants and eligibility criteria**

25 The participants were recruited from 10 elderly community centres located in various  
26 locations across Hong Kong. The inclusion and exclusion criteria are listed in table 1.

27

### 28 **Equity, diversity, and inclusion statement**

29 Our study encompassed all eligible cases based on the specified inclusion and exclusion  
30 criteria, without intentional exclusion of individuals from marginalized communities.  
31 We ensured the inclusion of participants across diverse genders, socioeconomic  
32 backgrounds, and technological proficiency levels. The author team comprised two  
33 women and seven men from various disciplines, including exercise physiology, health  
34 economics, medicine, exercise sociology, occupational therapy, and telemedicine. It  
35 also included two junior scholars. Data collection methods were consistent across all  
36 cases, irrespective of educational, or socioeconomic variations within the communities.  
37 Gender-specific findings were discussed in the subsequent analysis.

## 1 **Randomization and blinding**

2 Ten community centres will be coded and then randomly assigned to either the tele-  
3 exercise group (TE) or community-based group (CB) with a 1:1 allocation in a  
4 concealed, blinded fashion to minimize cross-over contamination between the groups.  
5 Randomization procedure and allocation sequence was supervised by an independent  
6 assistant. The project assistant enrolled participants in the community centres. Trained  
7 outcome assessors, who were blinded to group assignments, performed the assessments.  
8 Participants were aware of their unique training modes but had no contact with  
9 participants from other groups due to different locations. Instructors and researchers  
10 were not blinded and were instructed not to discuss group assignments with the  
11 participants and outcome assessors.

12

## 13 **Intervention programmes**

14 Both interventions have been described in detail in the published protocol.<sup>19</sup> All  
15 participants engaged in exercise training sessions three times a week for a duration of  
16 three months, either through tele-exercise (TE) or face-to-face at the community centres  
17 (CB). The participants in both groups were divided into classes consisting of 8 to 11  
18 individuals. The exercise programme followed a structured format, which included a  
19 warm-up, Otago exercise programme (OEP),<sup>23</sup> "workouts on-demand," and a cool-  
20 down.

21

### 22 *Intervention- tele-exercise group*

23 For the TE group, the exercise programme was delivered via Zoom (Zoom Video  
24 Communications Inc.) in the participants' homes, allowing for real-time online  
25 communication with the participants. Participants without suitable devices were  
26 provided with all the necessary devices.

27

### 28 *Safety measures and technological support for the tele-exercise group*

29 Prior to the intervention, home visits were conducted to ensure a safe home  
30 environment, assist with setting up online communication applications, and optimize  
31 the positioning of the tablet, chair, and participant for effective visual interaction. The  
32 first lesson took place at the community centre to familiarize participants with exercise  
33 safety rules and the OEP, followed by online training sessions. Participants were  
34 reminded to turn on their tablets and Wi-Fi before each class so that we could control  
35 their tablet remotely to promptly address technical issues. Participants performed all  
36 OEP exercises, starting at the beginner level with support for standing and walking.  
37 Camera and microphone activation were required to enhance interaction, with regular  
38 progress monitoring by the research team. Participants were reminded to wear  
39 appropriate exercise gear and maintain hydration.

40

1 *Intervention- community-based group*

2 For the CB group, the exercise classes were arranged at the community centres based  
3 on the residence of the recruited participants. The training programme was the same as  
4 that of TE group, except that it was conducted face-to-face at the community centre.

5

6 **Outcome measures**

7 Baseline assessments and post-intervention assessments at the three-month were  
8 conducted by trained and blinded assessors at the community centres. Participants  
9 received HK\$100 gift vouchers at 3 months for completing the training and assessments.  
10 In addition to the assessments, demographic information and background variables such  
11 as sex, age, and history of falls were collected. Cognitive function at baseline was  
12 evaluated using the Mini-Mental State Examination (MMSE).<sup>24</sup> The Chinese version of  
13 the Physical Activity Scale for the Elderly (PASE-C) was utilized to assess the physical  
14 activity level of older adults.<sup>25</sup>

15

16 *Primary outcomes*

17 Fall efficacy was evaluated using the Chinese version of the Fall Efficacy Scale-  
18 International (FES-I).<sup>26</sup> Participants were asked to proactively record any instances of  
19 falling and any adverse events in their diaries. The primary outcome measures also  
20 included SARC-CalF, grip strength assessments for both the right and left hands, a 6-  
21 meter walk test, a timed up and go test (TUG), the Berg Balance Scale score (BBS), the  
22 functional reach test (FRT), appendicular skeletal muscle mass index (ASMI)  
23 percentage of body fat and Physical Activity Scale for the Elderly-Chinese (PASE-C).  
24 The definition of possible sarcopenia, sarcopenia and severe sarcopenia were based on  
25 Chen, *et al*<sup>27</sup>

26

27 *Secondary outcomes*

28 The secondary outcomes evaluate older people's involvement and experience of the  
29 exercise programmes including exercise adherence, dropout rate and Physical Activity  
30 Enjoyment Scale (PACES).<sup>28</sup> The exercise adherence rate was defined as the percentage  
31 of attended classes out of the total 36 classes.

32

33 **Data analysis**

34 Baseline characteristics including age, adherence rate, and dropout rate, were analyzed  
35 using an independent t-test. An intention-to-treat analysis, following the guidelines for  
36 randomized controlled trials,<sup>29</sup> was employed, including all originally randomized  
37 participants in the study. For the outcome measures, a linear mixed models with time  
38 and group as the fixed effect and within person correlation modelled as a random effect.  
39 The differences between categorical variables such as education level and %  
40 participants with possible sarcopenia were analyzed by Chi-square test. A significance

1 level of 0.05 was set for all tests. The statistical analysis was carried out using SPSS,  
2 version 26.0 (IBM Co., Armonk, NY).

3 Sensitivity analyses were conducted to validate the statistical findings. These included  
4 utilizing multiple imputation to address missing data, which confirmed consistent  
5 results with the original analysis.

6

### 7 **Deviations from the registered trial protocol**

8 Instead of the initially planned 92 participants, we recruited 91 participants, factoring  
9 in an anticipated attrition rate of 20% to account for potential dropouts. Despite this  
10 deviation, the trial remains adequately powered. As the follow-up period has yet to be  
11 completed, we have only reported the results for baseline and the 3-month timepoint.  
12 In terms of statistical analysis, we employed a linear mixed model instead of a two-  
13 way repeated measures ANOVA. This decision was made because a linear mixed  
14 model is better suited to handle unbalanced data, enables capturing individual  
15 differences, reduces within-subject variability.

16

## 17 **RESULTS**

### 18 **Flow of participants**

19 During the screening period from October 2021 to June 2022, a total of 212 older adults  
20 were identified for preliminary screening. Out of these, 120 individuals were excluded  
21 based on the inclusion and exclusion criteria of the study. Eventually, 91 participants  
22 successfully met the inclusion criteria. The TE group comprised 45 participants, while  
23 the CB group consisted of 46 participants (Figure 1).

24

### 25 **Participant characteristics**

26 The baseline characteristics of the participants did not show significant differences  
27 between the CB and TE groups, as summarized in Table 2.

28

### 29 **Technological accessibility and technological support for the TE participants**

30 In terms of smartphone ownership, the TE group exhibited a higher percentage at 84.4%,  
31 while the CB group reported 71.7% ( $p < 0.05$ ). Similarly, in terms of home Wi-Fi  
32 ownership, the TE group also had a higher percentage at 71.1%, compared to the CB  
33 group at 58.7%, but this difference did not reach a significant level. Additionally, only  
34 17.8% of TE participants had previous experience with tele-exercise (Table 2).

35 Baseline home visits were conducted for all participants before the intervention, with  
36 an average of 3.7 visits per participant. Additional visits addressed technological issues  
37 and provided support, totaling 260 visits (including baseline visits) for the 45  
38 participants in the TE group, averaging 5.8 visits per participant (range: 0-12 visits).



1

## 2 **Primary outcomes- falls incidence, fall risks and sarcopenia status**

3 There was no significant difference between the groups in the falls incidence. Prior to  
4 the intervention, the average number of falls per participant was  $1.57 \pm 0.83$  over the  
5 past 12 months in the CB and  $1.78 \pm 0.77$  in the TE. The majority of falls were classified  
6 as minor incidents (CB: 97.2% vs TE: 97.8%).<sup>30</sup> During the intervention, the CB group  
7 reported no falls, whereas one participant in the TE group reported experiencing a fall  
8 outside of the lessons, which resulted in a minor injury (Table 3). The FES-I scores  
9 improved significantly in both groups, indicating a reduction in fear of falling. ( $p < 0.001$ )  
10 (Table 4).

11 There were no significant differences between the two groups or between the two time  
12 points in the proportion of participants with possible sarcopenia, sarcopenia, and severe  
13 sarcopenia. However, there was a trend towards a decrease in participants with possible  
14 sarcopenia and severe sarcopenia in the CB group over time (Table 3).

15

## 16 **Primary outcomes- physical function and activity level**

17 Although no significant difference was observed between the CB and TE interventions,  
18 most outcomes showed improvement after the 3-month intervention (Table 4). The 6-  
19 meter walk test, the TUG scores and the BBS scores improved significantly in both  
20 groups over the 3-month period ( $p < 0.05$ ).

21 SARC-CalF scores and the FRT scores demonstrated significant improvement in the  
22 CB group compared with its baseline ( $p < 0.05$ ). Handgrip strength, measured in all  
23 participants, did not show significant changes between or within groups. However,  
24 within the female subgroup, CB participants showed a significant increase in handgrip  
25 strength compared with its baseline ( $p < 0.001$ ). Activity levels, assessed by the Physical  
26 Activity Scale for the Elderly (PASE-C), significantly improved in both groups  
27 ( $p < 0.001$ ).

28

## 29 **Primary outcomes- body composition changes among female participants**

30 Due to the different standards for body composition between genders and the significant  
31 proportion of female participants in both groups, the body composition changes among  
32 female participants (CB  $n=41$ ; TE  $n=39$ ) were analyzed and presented. The results  
33 showed minimal differences between the CB and the TE (Table 5). Calf circumference,  
34 BMI and appendicular skeletal muscle mass index (ASMI) remained relatively stable  
35 in both groups over the 3-month period. However, body weight exhibited a significant  
36 decrease in the TE group ( $p < 0.05$ ).

37

## 38 **Secondary outcomes- adherence rate, dropout rate and PACES**

39 Adherence rates were high in both groups, with the CB group averaging 90.0%  
40 adherence and the TE group averaging 85.0%. The dropout rate was 0% in the CB group,

1 while the TE group had a dropout rate of 4.4%. The scores on the PACES were 108.6  
2 in the CB group and 108.2 in the TE group, out of a total of 126 (Table 2).

3

#### 4 **Adverse events reporting**

5 One participant in the TE group reported general tiredness and pain during screening  
6 phase, but her doctor found no issues after thorough examinations and tests. Living  
7 alone and rarely engaging in social activities, she insisted on participating in our  
8 programme to maintain her physical functioning.

9 During the tele-exercise class, she reported tiredness and knee and lower back pain at  
10 the beginning. The instructor advised her to rest when needed and practice at an easier  
11 level. With the frequent reminders to lower the intensity, her problems subsided. She  
12 completed the programme with an adherence rate of 72.2%.

## 13 **DISCUSSION**

### 14 **Key findings**

15 To our knowledge, this study is the first rigorously designed RCT with sufficient  
16 statistical power to investigate the effectiveness of the synchronous group-based tele-  
17 exercise compared with the community-based group in older adults at risk of falls. In  
18 contrast to previous trials<sup>14 15</sup>, our study includes a comprehensive range of outcomes  
19 such as fall efficacy, fall incidence, sarcopenia status, physical function, activity level,  
20 body composition, exercise adherence, dropout, enjoyment, adverse events,  
21 technological accessibility and their education backgrounds. The study findings  
22 indicate that both the CB and TE interventions were effective in decreasing fear of  
23 falling, and enhancing physical function including mobility, balance and gait speed,  
24 among the participants. These results regarding the effectiveness of the modified OEP  
25 are consistent with the findings of systematic review conducted by Martins, *et al*<sup>31</sup> and  
26 Wu, *et al*<sup>32</sup> The positive outcomes can be attributed to the fact that our intervention  
27 adhered to the recommended effective programme requirements identified by Wu, *et*  
28 *al*<sup>32</sup>, with an average duration of 45 minutes, three times per week for 12 weeks.

29 The study employed synchronous tele-exercise, utilizing video-linked appointments  
30 supervised by healthcare professionals, and emphasized three main strategies: self-  
31 efficacy, self-confidence, and empowerment, to enhance the exercise experience of the  
32 participants.<sup>19 33 34</sup> Immediate feedback after each class facilitated timely personalized  
33 guidance, addressing participants' concerns. All classes were led by the same  
34 knowledgeable instructor who had over 10 years of experience in teaching older adults  
35 and people with chronic diseases. Our training programme effectively mitigated the  
36 challenges associated with remote exercise sessions, as evidenced by the lack of  
37 significant differences between the two groups in physical function.

38

39 The study demonstrated high adherence and enjoyment among participants in both the  
40 CB and TE interventions, with low dropout rates and high PACES scores. CB achieved  
41 90% adherence and TE reached 85%, surpassing the approximately 70% reported in a

1 systematic review of community-based exercise programmes.<sup>35</sup> As recommended, an  
2 80% adherence rate is considered feasible.<sup>36</sup> Consistent with previous studies,  
3 community-dwelling older adults expressed high satisfaction with online exercise  
4 training.<sup>37-39</sup> The success of the tele-exercise programme can be attributed to factors  
5 such as professional support, individualized technology orientation sessions, and  
6 standby technical assistance.<sup>39</sup> <sup>40</sup> Our programme also provided prompt technical  
7 assistance, averaging 5.8 home visits per participant throughout the 36 lessons,  
8 accounting for approximately 16.1% of the sessions. These measures ensured prompt  
9 problem-solving, exercise safety, and the absence of serious adverse event, indicating a  
10 high margin of exercise safety with the synchronous online delivery of modified OEP.

11

## 12 **Upper body strength improvements**

13 While the OEP primarily focuses on strength and balance exercises for the lower  
14 extremities, it has been shown to prevent a decline in handgrip strength when compared  
15 to no intervention control<sup>41</sup> and conventional care.<sup>42</sup> However, recent meta-analysis  
16 reviews did not find clear benefits of the OEP on upper body strength in older adults.<sup>32</sup>  
17 These analyses did not analyze the changes based on gender, as there are gender  
18 differences in the norm of handgrip strength. Nevertheless, our study observed  
19 significant improvements in upper body strength exclusively among female participants  
20 within the CB group. The primary purpose of engaging the upper limb muscles was to  
21 provide support and maintain balance during exercises. While this aspect may appear  
22 minor, it holds significant importance for older adults who are at risk of falls. Previous  
23 research has demonstrated that even small volumes of resistance exercise, performed  
24 briefly and infrequently, can lead to substantial increases in muscular strength.<sup>43</sup> The  
25 improvement in handgrip strength in the CB may explain the decreasing trend of  
26 possible sarcopenia and severe sarcopenia among the CB participants over time.

27

## 28 **Impact on body weight and fat**

29 Overall, the impact of the interventions on body composition parameters was modest,  
30 with slight variations between CB and TE groups. However, subgroup analysis revealed  
31 that female participants in the TE group experienced a significant decrease in body  
32 weight after three months, compared to baseline. The significant decrease in body  
33 weight in our study may be due to increased physical activity levels, as indicated by  
34 higher PASE-C scores. Regular participation in Otago-based exercise can serve as an  
35 effective energy expenditure method for older adults at risk of falls, particularly for  
36 those who did not have established exercise habits and maintained very low activity  
37 levels. Unlike Duckham, *et al*<sup>44</sup>, who demonstrated a reduction in fat mass with an  
38 Otago-based exercise program, and Hong, *et al*<sup>45</sup>, who found improvements in lower  
39 limb muscle mass through resistance exercise delivered via video conferencing, our  
40 results showed a divergence. It's worth noting that Duckham, *et al*<sup>44</sup>'s program had  
41 twice the duration of ours, lasting for 24 weeks. Additionally, Hong, *et al*<sup>45</sup> incorporated  
42 nutrition education alongside exercise, which is crucial for preventing and managing  
43 sarcopenia.<sup>46</sup> This disparity in approach could explain the significant reduction in fat  
44 mass and increase in muscle mass observed in their study but not in ours.

## 1 **Bridging technological and education gaps in tele-exercise**

2 Most tele-exercise studies primarily recruited individuals with existing internet access  
3 at home, favoring those who were technologically competent.<sup>11-13 47</sup> A strength of our  
4 study was that technological competence and device ownership were not inclusion  
5 criteria. We provided participants with the necessary devices, welcoming individuals  
6 with various technological backgrounds. Our sample consisted of less educated  
7 individuals, with over 50% completed primary education or below, and only one TE  
8 participant completing university. Our findings indicated that older adults, regardless  
9 of education and technological proficiency, could enjoy tele-exercise when  
10 accompanied by well-designed programmes, technical support, and timely feedback.  
11 Furthermore, the utilization of commonly available telecommunications software in the  
12 trial, instead of custom-built systems<sup>13</sup>, enhanced the generalizability of the findings.<sup>48</sup>

## 13 **Technological exposure and potential selection bias**

14 Our findings revealed a significantly higher rate of smartphone ownership in the TE  
15 group (84.4%) compared to the CB (71.7%) ( $p < 0.05$ ), indicating greater technological  
16 exposure among TE participants. Additionally, the TE group had a higher proportion of  
17 participants with Wi-Fi at home (72.1% vs. CB: 58.7%, N.S.). The TE group also  
18 exhibited slightly higher levels of education, suggesting potential selection bias towards  
19 technologically experienced and higher-educated individuals. It is important to note that  
20 three participants declined participation before the intervention phase due to family  
21 objections and concerns about unsafe home environments. This highlights the presence  
22 of skepticism towards the use of tele-exercise among older adults, indicating that some  
23 individuals and their families may have reservations about engaging in exercise  
24 programmes remotely.

25

## 26 **Limitations**

27 One noteworthy concern with tele-exercise is the potential impact on the proper  
28 execution of exercises, especially for older adults with specific health conditions or  
29 mobility issues. Due to intrinsic differences between the delivery modes of CB and TE,  
30 the instructor could only provide verbal corrections for participants' movements,  
31 without the ability to physically assist them.<sup>19</sup> It is worth noting that conducting tele-  
32 exercise sessions in the limited space of most Hong Kong residences presents  
33 challenges. Census and Statistics Department<sup>49</sup> indicate that the median floor areas for  
34 domestic households and individuals in Hong Kong are 40 and 16 m<sup>2</sup>, respectively. This  
35 spatial constraint could impact the ability to capture a full view of participants while  
36 they were standing during tele-exercise sessions. To overcome this issue, we made  
37 efforts during home visits to find the optimal placement and angle for tablets with built-  
38 in cameras to maximize visibility during the exercise sessions. To ensure understanding  
39 of the exercise programme and promote exercise safety, all participants were required  
40 to attend the first class at the community centre. This allowed for in-person instructions  
41 and reminders before transitioning to tele-exercise sessions.<sup>19</sup> It is important to note  
42 that the success of this program may not be transferable to other exercises that involve  
43 more dynamic movements such as standing, sitting, and lying down, within a single  
44 lesson. From a technological standpoint, it would be beneficial for the technology

1 company to explore the possibility of incorporating tablets with wide-angle front  
2 cameras or establishing a seamless connection between a tablet and an external camera  
3 without any delays. These enhancements would help improve visibility during tele-  
4 exercise sessions.

5

## 6 **CONCLUSION**

7 To our knowledge, this is the first rigorously designed RCT with sufficient statistical  
8 power and a comprehensive set of outcomes to explore the effectiveness of the tele-  
9 exercise group compared with the community-based group. Both CB and TE  
10 interventions yielded positive outcomes, high participant satisfaction, and no serious  
11 adverse events. These results highlighted the effectiveness of these approaches for falls  
12 prevention and physical improvement in older adults at risk of falls, including those  
13 with varying education levels and technological competence, even among those who  
14 were new to tele-exercise. The study provides valuable insights and potential strategies  
15 for safely and effectively delivering synchronous tele-exercise training among  
16 community-dwelling older adults at risk of falls. These findings have significant  
17 implications for enhancing older adults' health and well-being, especially when in-  
18 person interventions are challenging or inaccessible.

19

1 **TABLES AND FIGURE**

2

3 Figure 1 Flow of Participants.

4 Table 1 Inclusion and exclusion criteria (adopted from Chan, *et al*<sup>19</sup>).

5 Table 2 Demographic characteristics and satisfaction of the 3-month training  
6 programme.

7 Table 3 Falls incidence and sarcopenia analysis.

8 Table 4 Comparison of fall risk, physical function and activity level at baseline and after  
9 the intervention.

10 Table 5 Body composition changes among female participants (CB n=41; TE n=39).

11

1  
2  
3  
4  
5  
6  
7  
8  
9  
10  
11  
12  
13  
14  
15  
16  
17  
18  
19  
20  
21  
22  
23  
24  
25  
26  
27  
28  
29  
30

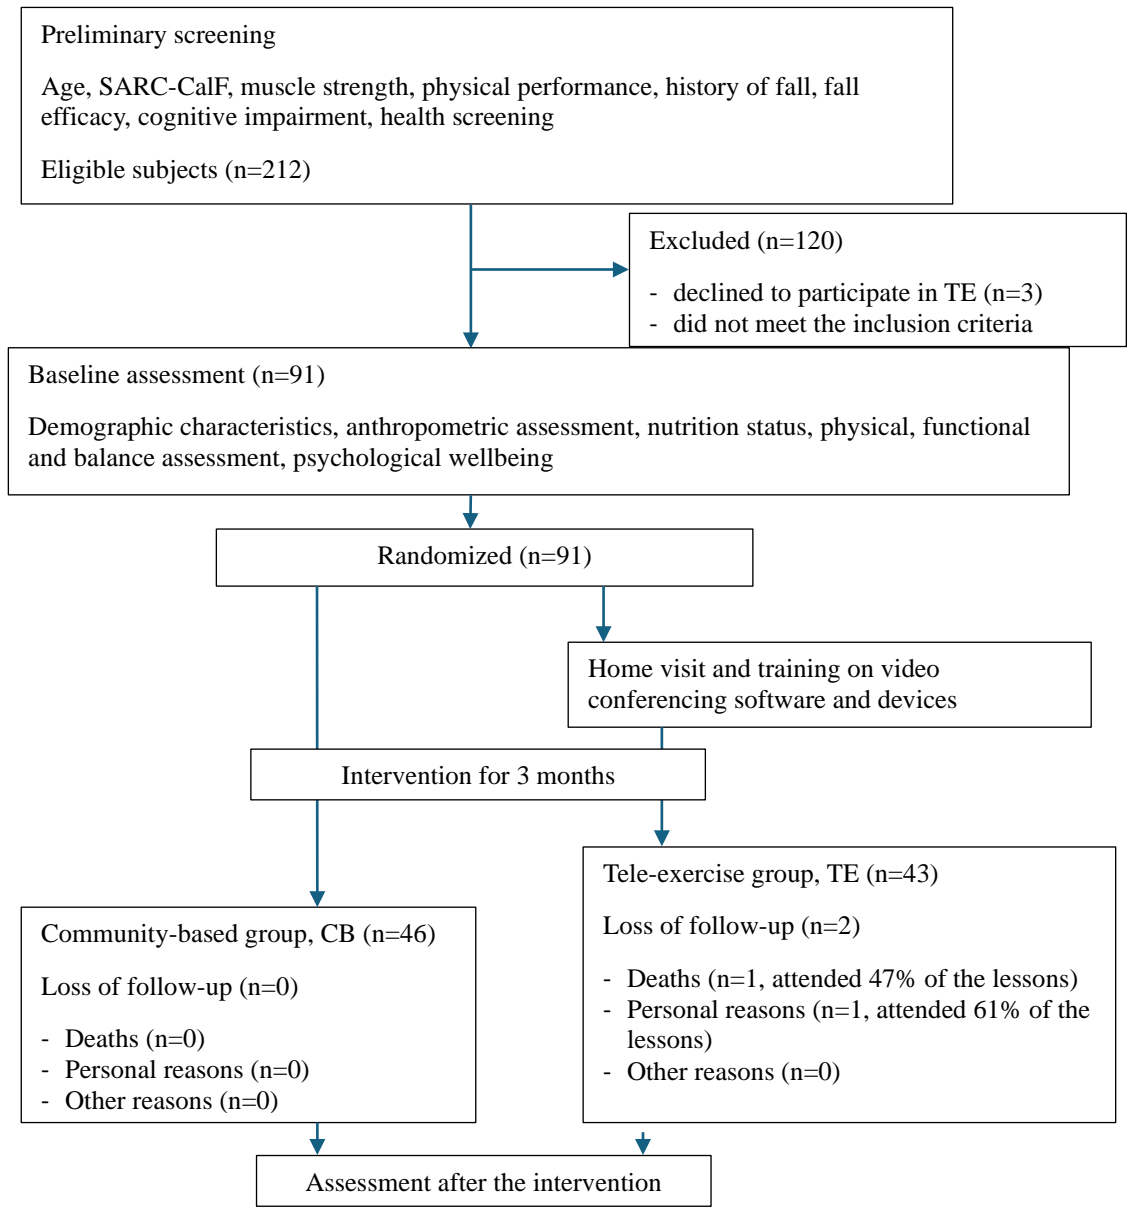

Figure 1 Flow of Participants.

| Inclusion criteria                                                                                                                                                                                                                                                                                                                                                                                                                | Exclusion criteria                                                                                                                                                                                                                                                                                                                                                                                                                                                                                                       |
|-----------------------------------------------------------------------------------------------------------------------------------------------------------------------------------------------------------------------------------------------------------------------------------------------------------------------------------------------------------------------------------------------------------------------------------|--------------------------------------------------------------------------------------------------------------------------------------------------------------------------------------------------------------------------------------------------------------------------------------------------------------------------------------------------------------------------------------------------------------------------------------------------------------------------------------------------------------------------|
| <ul style="list-style-type: none"><li>• permanent residents of Hong Kong</li><li>• aged 65 years or above living independently at home</li><li>• diagnosed with possible sarcopenia and/or having had either a fall in the past year or fear of falling with a score of <math>\geq 20</math> points on FES-I</li><li>• able to speak and listen to Cantonese</li><li>• able to walk without mobility aids in their home</li></ul> | <ul style="list-style-type: none"><li>• diagnosed with dementia or cognitive impairment, Mini-Mental State (MMSE) <math>&lt; 25</math></li><li>• severe vision impairments that do not permit the use of a tablet, reading of the exercise booklet, and completing the activity diaries</li><li>• unable to pass the preparticipation Health Screening of the ACSM and the subsequent medical clearance</li><li>• regular physical activities in the past 6 months based on the definition of WHO<sup>50</sup></li></ul> |

1 Table 1 Inclusion and exclusion criteria (adopted from Chan, *et al*<sup>19</sup>).

2



|                                                      | Community-based (CB) | Tele-exercise (TE) |
|------------------------------------------------------|----------------------|--------------------|
| <b>Baseline Characteristics</b>                      |                      |                    |
| n (excluding dropout)                                | 46                   | 45                 |
| Age (Range)                                          | 77.3 ± 6.7 (65-93)   | 74.8 ± 6.2 (65-91) |
| Proportion of female participants                    | 89.1% (41)           | 86.6% (39)         |
| Weight (kg)                                          | 56.6 ± 12.0          | 58.8 ± 11.6        |
| Height (cm)                                          | 150.3 ± 6.3          | 153.6 ± 8.2        |
| BMI (kg/m <sup>2</sup> )                             | 25.5 ± 0.7           | 24.2 ± 0.7         |
| Mini Nutritional Assessment (MNA)                    | 24.9 ± 0.3           | 25.1 ± 0.3         |
| Mini Mental State Examination (MMSE)                 | 27.59 ± 1.89         | 27.84 ± 1.78       |
| <b>Education Level</b>                               |                      |                    |
| Junior primary or below                              | 47.8%                | 22.2%              |
| Senior primary                                       | 21.7%                | 35.6%              |
| Junior Secondary                                     | 21.7%                | 17.8%              |
| Senior Secondary                                     | 8.6%                 | 22.2%              |
| University or above                                  | 0%                   | 2.2%               |
| <b>Technological accessibility</b>                   |                      |                    |
| Smartphone ownership                                 | 71.7%                | 84.4%*             |
| Home Wi-Fi ownership                                 | 58.7%                | 71.1%              |
| Previous experiences with tele-exercise              | N/A                  | 17.8%              |
| <b>Participant involvement and experience</b>        |                      |                    |
| Dropout during intervention (number of participants) | 0% (0)               | 4.4% (2)           |
| Adherence rate                                       | 90.0 ± 7.1 %         | 85.0 ± 11.8%       |
| Physical Activity Enjoyment Scale (PACES)            | 108.6 ± 9.3%         | 108.2 ± 7.9%       |

1 \**p*<0.05 compared with CB

1 Table 2. Demographic characteristics and satisfaction of the 3-month training  
2 programme.

3

|                                            | Baseline (last 12 months before intervention)) |             | 3 month   |             |
|--------------------------------------------|------------------------------------------------|-------------|-----------|-------------|
| <b>Fall incidence</b>                      |                                                |             |           |             |
|                                            | <b>CB</b>                                      | <b>TE</b>   | <b>CB</b> | <b>TE</b>   |
| Average no. of falls per participant       | 1.57 ± 0.83                                    | 1.78 ± 0.77 | 0         | 0.02 ± 0.15 |
| Minor injuries, %                          | 97.2%                                          | 97.8%       | 0%        | 100%        |
| Serious injuries, hospitalisation %        | 0.03%                                          | 2.5%        | 0%        | 0           |
| <b>Sarcopenia analysis</b>                 |                                                |             |           |             |
|                                            | <b>CB</b>                                      | <b>TE</b>   | <b>CB</b> | <b>TE</b>   |
| % of participants with Possible Sarcopenia | 41.3%                                          | 33.3%       | 26.1%     | 35.6%       |
| % of participants with Sarcopenia          | 39.1%                                          | 28.9%       | 39.1%     | 28.9%       |
| % of participants with Severe Sarcopenia   | 28.3%                                          | 15.6%       | 13.0%     | 17.8%       |

4

5 \*Possible sarcopenia: SARC-CalF $\geq$ 11, handgrip strength M:<28 kg, F<18 kg

6 Sarcopenia: SARC-CalF $\geq$ 11, ASMI M<7.0 kg/m<sup>2</sup>, F<5.7 kg/m<sup>2</sup>, handgrip strength  
7 M:<28 kg; F<18 kg or 6-metre walk<1.0 m/s

8 Severe Sarcopenia: SARC-CalF $\geq$ 11, ASMI M<7.0 kg/m<sup>2</sup>, F<5.7 kg/m<sup>2</sup>, handgrip  
9 strength M:<28 kg; F<18 kg and 6-metre walk<1.0 m/s

10

11

12 Table 3 Falls incidence and sarcopenia analysis.

13

| Outcomes                      | Baseline (mean ± SE)  | 3- month (mean ± SE)  | Mean difference (95% CI) | p-value<br>Within Group |
|-------------------------------|-----------------------|-----------------------|--------------------------|-------------------------|
| <b>FES-I</b>                  |                       |                       |                          |                         |
| CB                            | 36.41 ± 1.03          | 33.37 ± 1.19          | -3.04 (-4.35 to -1.73)   | <0.001                  |
| TE                            | 34.98 ± 1.11          | 32.49 ± 1.12          | -2.49 (-3.81 to -1.16)   | <0.001                  |
| Mean difference (95% CI)      | -1.44 (-4.56 to 1.69) | -0.88 (-4.01 to 2.25) |                          |                         |
| <i>p-value Between Groups</i> | 0.365                 | 0.580                 |                          |                         |
| <b>SARC-CalF</b>              |                       |                       |                          |                         |
| CB                            | 8.04 ± 0.70           | 7.04 ± 0.67           | -1 (-1.79 to -0.21)      | 0.013                   |
| TE                            | 8.56 ± 0.70           | 8.04 ± 0.62           | -0.52 (-1.31 to 0.28)    | 0.2                     |
| Mean difference (95% CI)      | 0.51 (-1.37 to 2.40)  | 0.10 (-0.89 to 2.88)  |                          |                         |
| <i>p-value Between Groups</i> | 0.591                 | 0.298                 |                          |                         |
| <b>6-meter Walk (m/s)</b>     |                       |                       |                          |                         |
| CB                            | 0.69 ± 0.02           | 0.75 ± 0.02           | 0.07 (0.04 to 0.10)      | <0.001                  |
| TE                            | 0.68 ± 0.03           | 0.76 ± 0.03           | 0.08 (0.04 to 0.11)      | <0.001                  |
| Mean difference (95% CI)      | -0.01 (-0.08 to 0.06) | 0.00 (-0.07 to 0.07)  |                          |                         |
| <i>p-value Between Groups</i> | 0.855                 | 0.929                 |                          |                         |
| <b>TUG</b>                    |                       |                       |                          |                         |
| CB                            | 15.59 ± 1.46          | 13.88 ± 1.73          | -1.71 (-3.05 to -0.38)   | 0.013                   |
| TE                            | 12.89 ± 0.74          | 11.15 ± 0.58          | -1.74 (-3.10 to -0.39)   | 0.012                   |
| Mean difference (95% CI)      | -2.70 (-6.16 to 0.77) | -2.73 (-6.19 to 0.74) |                          |                         |
| <i>p-value Between Groups</i> | 0.126                 | 0.122                 |                          |                         |
| <b>BBS</b>                    |                       |                       |                          |                         |
| CB                            | 46.20 ± 1.05          | 49.74 ± 1.39          | 3.54 (1.40 to 5.68)      | 0.001                   |
| TE                            | 47.22 ± 1.14          | 50.67 ± 0.72          | 3.45 (1.28 to 5.61)      | 0.002                   |
| Mean difference (95% CI)      | -1.03 (-2.07 to 4.12) | -0.93 (-2.16 to 4.02) |                          |                         |
| <i>p-value Between Groups</i> | 0.513                 | 0.553                 |                          |                         |
| <b>FRT (cm)</b>               |                       |                       |                          |                         |
| CB                            | 21.67 ± 1.11          | 24.41 ± 0.94          | 2.74 (-0.66 to 4.81)     | 0.010                   |
| TE                            | 26.59 ± 0.97          | 26.75 ± 1.13          | 0.16 (-1.94 to 2.25)     | 0.881                   |
| Mean difference (95% CI)      | 4.92 (2.00 to 7.84)   | 2.34 (-0.58 to 5.26)  |                          |                         |
| <i>p-value Between Groups</i> | 0.001                 | 0.115                 |                          |                         |

|                                         |                         |                         |                        |        |
|-----------------------------------------|-------------------------|-------------------------|------------------------|--------|
| <b>Handgrip (kg) (all participants)</b> |                         |                         |                        |        |
| CB                                      | 16.98 ± 0.67            | 18.18 ± 0.70            | 1.2 (-0.20 to 2.60)    | 0.092  |
| TE                                      | 19.25 ± 0.94            | 19.81 ± 0.90            | 0.56 (-0.86 to 1.98)   | 0.434  |
| Mean difference (95% CI)                | 2.27 (0.01 to 4.55)     | 1.63 (-0.63 to 3.89)    |                        |        |
| <i>p-value Between Groups</i>           | 0.049                   | 0.155                   |                        |        |
| <b>Handgrip (kg) (Female only)</b>      |                         |                         |                        |        |
| CB                                      | 16.14 ± 0.57            | 18.46 ± 0.76            | 2.32 (1.00 to 3.64)    | <0.001 |
| TE                                      | 17.95 ± 0.89            | 18.47 ± 0.82            | 0.53 (-0.82 to 1.88)   | 0.439  |
| Mean difference (95% CI)                | 1.80 (-0.33 to 3.94)    | 0.02 (-2.12 to 2.15)    |                        |        |
| <i>p-value Between Groups</i>           | 0.097                   | 0.989                   |                        |        |
| <b>PASE-C</b>                           |                         |                         |                        |        |
| CB                                      | 122.02 ± 9.62           | 157.63 ± 9.54           | 35.61 (31.48 to 39.74) | <0.001 |
| TE                                      | 119.51 ± 9.25           | 152.65 ± 8.75           | 33.14 (28.97 to 37.32) | <0.001 |
| Mean difference (95% CI)                | -2.51 (-28.65 to 23.63) | -4.98 (-31.12 to 21.16) |                        |        |
| <i>p-value Between Groups</i>           | 0.849                   | 0.706                   |                        |        |

1 FES-I: Fall Efficacy Scale; TUG: Timed Up and Go Test; BBS: Berg Balance Scale score; FRT: Functional Reach Test; PASE-C:  
 2 Chinese version of the Physical Activity Scale for the Elderly;

3 Table 4. Comparison of fall risk, physical function and activity level at baseline and  
 4 after the intervention.

5

1

| Outcomes                      | Baseline <sup>a</sup> (mean ± SE) | 3- month <sup>b</sup> (mean ± SE) | Mean difference (95% CI) | p-value Within Group |
|-------------------------------|-----------------------------------|-----------------------------------|--------------------------|----------------------|
| <b>Calf Circumference</b>     |                                   |                                   |                          |                      |
| CB                            | 33.98 ± 0.56                      | 33.96 ± 0.57                      | -0.01 (-0.37 to 0.35)    | 0.945                |
| TE                            | 33.86 ± 0.54                      | 33.85 ± 0.52                      | -0.01 (-0.37 to 0.36)    | 0.976                |
| Mean difference (95% CI)      | -0.12 (-1.65 to 1.41)             | -0.11 (-1.64 to 1.42)             |                          |                      |
| <i>p-value Between Groups</i> | 0.873                             | 0.886                             |                          |                      |
| <b>Weight</b>                 |                                   |                                   |                          |                      |
| CB                            | 55.89 ± 1.87                      | 55.48 ± 1.83                      | -0.35 (-1.09 to 0.93)    | 0.356                |
| TE                            | 57.53 ± 1.77                      | 56.50 ± 1.62                      | -1.03 (-1.78 to -0.28)   | 0.008                |
| Mean difference (95% CI)      | 1.64 (-3.32 to 6.59)              | 0.95 (-4.00 to 5.91)              |                          |                      |
| <i>p-value Between Groups</i> | 0.513                             | 0.703                             |                          |                      |
| <b>% Body fat</b>             |                                   |                                   |                          |                      |
| CB                            | 36.23 ± 0.88                      | 36.69 ± 0.85                      | 0.48 (-0.97 to 1.94)     | 0.511                |
| TE                            | 35.01 ± 1.05                      | 35.20 ± 1.62                      | 0.19 (-1.29 to 1.67)     | 0.797                |
| Mean difference (95% CI)      | -1.26 (-4.41 to 1.89)             | -1.55 (-4.70 to 1.60)             |                          |                      |
| <i>p-value Between Groups</i> | 0.429                             | 0.331                             |                          |                      |
| <b>BMI</b>                    |                                   |                                   |                          |                      |
| CB                            | 25.43 ± 0.81                      | 24.94 ± 0.74                      | -0.48 (-1.21 to 0.24)    | 0.187                |
| TE                            | 24.99 ± 0.70                      | 24.45 ± 0.63                      | -0.53 (-1.27 to 0.20)    | 0.151                |
| Mean difference (95% CI)      | -0.51 (-2.54 to 1.51)             | -0.57 (-2.59 to 1.46)             |                          |                      |
| <i>p-value Between Groups</i> | 0.616                             | 0.581                             |                          |                      |
| <b>ASMI</b>                   |                                   |                                   |                          |                      |
| CB                            | 5.74 ± 0.14                       | 5.70 ± 0.13                       | -0.03 (-0.35 to 0.28)    | 0.827                |
| TE                            | 6.08 ± 0.12                       | 6.19 ± 0.27                       | 0.11 (-0.21 to 0.43)     | 0.490                |
| Mean difference (95% CI)      | 0.34 (-0.15 to 0.83)              | 0.48 (-0.01 to 0.98)              |                          |                      |
| <i>p-value Between Groups</i> | 0.173                             | 0.072                             |                          |                      |

2 BMI: body mass index; ASMI: Appendicular skeletal muscle mass index ASMI

3 Table 5 Body composition changes among female participants (CB n=41; TE n=39).

4

5

## 6 Author affiliations

7 <sup>1</sup>College of Professional and Continuing Education, The Hong Kong Polytechnic  
8 University, Hong Kong SAR, China

9 <sup>2</sup>School of Management, Tung Wah College, Hong Kong SAR, China

10 <sup>3</sup>Department of Rehabilitation Sciences, The Hong Kong Polytechnic University,  
11 Hong Kong SAR, China

12 <sup>4</sup>Hong Kong Telemedicine Association, Hong Kong SAR, China

13

## 1 **Acknowledgements**

2 The authors are grateful to the Centre for Ageing and Healthcare Management Research  
3 (CAHMR), College of Professional and Continuing Education, The Hong Kong  
4 Polytechnic University for coordination with the elderly services providers i.e. Sik Sik  
5 Yuen. Thank Sik Sik Yuen for recruiting older people and all the participants for joining  
6 this study. The authors would like to express their gratitude to Mr. Au Wing Ho for his  
7 exceptional exercise teaching provided to all the participants. Additionally, the authors  
8 extend their heartfelt thanks to the student helpers who offered technical support to the  
9 participants.

10

## 11 **Author's contribution**

12 KOWC, PPY, BYFF, VTSL, FSFN, WCPF and TKCN conceived the study. KOWC  
13 and JLCC wrote the main manuscript text. ISC collected the data. KOWC and ISC  
14 performed statistical analysis. All authors reviewed the manuscript and approved the  
15 final version of the manuscript.

16

## 17 **Funding**

18 The study was funded by the Health and Medical Research Fund (HMRF) under the  
19 Health Bureau of the Government of the Hong Kong Special Administrative Region of  
20 the People's Republic of China (05200028). The funder has no role on the study design,  
21 protocol preparation, data collection and management, or future data analysis and  
22 interpretation, writing of the report, and the decision to submit the report for publication.  
23 They have no authority over any of these activities.

24

## 25 **Competing interests**

26 The authors declare that they have no competing interests.

27

## 28 **Patient and public involvement statement:**

29 Patients and/or the public were not involved in the design, or conduct, or reporting, or  
30 dissemination plans of this research.

31

32 **Consent for publication** Obtained.

33

## 34 **Ethics approval and consent to participate**

35 The study conforms to the Declaration of Helsinki. The study involves human  
36 participants and was approved by the Ethics Committee of the College of Professional  
37 and Continuing Education, The Hong Kong Polytechnic University (RC/ETH/H/0029).

1 All participants provided informed consent to participate in the study prior to their  
2 involvement.

3

#### 4 **Availability of data and materials**

5 Data available upon reasonable request if permitted by the respective ethics vote.

6

#### 7 **ORCID iDs**

8 Karly O.W. CHAN: 0000-0001-7098-519X

9 Peter P.M. YUEN: 0000-0002-0134-0141

10 Ben Y.F. FONG: 0000-0003-0909-0674

11 Vincent T.S. LAW: 0000-0001-8204-3925

12 Fowie S.F. NG: 0000-0002-6634-0345

13 Janet L.C. Lee: 0000-0001-8447-6855

14 I.S. CHEUNG: N/A

15 Tommy K.C. Ng: 0000-0002-7715-9533

16 Wilson C.P. FUNG: N/A

17

#### 18 **References**

- 19 1. Salari N, Darvishi N, Ahmadipanah M, et al. Global prevalence of falls in the older adults:  
20 a comprehensive systematic review and meta-analysis. *J Orthop Surg Res* 2022;17(1)  
21 doi: 10.1186/s13018-022-03222-1
- 22 2. Heinrich S, Rapp K, Rissmann U, et al. Cost of falls in old age: a systematic review.  
23 *Osteoporos Int* 2010;21:891-902.
- 24 3. Alexander BH, Rivara FP, Wolf ME. The cost and frequency of hospitalization for fall-  
25 related injuries in older adults. *Am J Public Health* 1992;82(7):1020-23. doi:  
26 10.2105/ajph.82.7.1020
- 27 4. Wang AQ-L, Ng BH-P, Cheung LP-C, Chin RP-H. Factors Affecting Mortality and  
28 Hospital Admissions after Hip Surgery among Elderly Patients with Hip Fracture in  
29 Hong Kong – Review of a Three-Year Follow-Up. *Hong Kong J Occup Ther*  
30 2017;30(1):6-13. doi: 10.1016/j.hkjot.2017.10.004
- 31 5. Wong TM, Leung FKL, Lau TW, et al. Effectiveness of a Day Rehabilitation Program in  
32 Improving Functional Outcome and Reducing Mortality and Readmission of Elderly  
33 Patients With Fragility Hip Fractures. *Geriatr Orthop Surg Rehabil* 2018;9:1-8. doi:  
34 10.1177/2151459318759355
- 35 6. El-Khoury F, Cassou B, Charles M-A, Dargent-Molina P. The effect of fall prevention  
36 exercise programmes on fall induced injuries in community dwelling older adults:  
37 systematic review and meta-analysis of randomised controlled trials. *BMJ* 2013;347
- 38 7. Lee JLC, Lou VWQ, Kwan RYC. The Experience of Participating in Remotely Delivered  
39 Online Exercise Classes During the COVID-19 Pandemic Among Community-  
40 Dwelling Older Adults and Its Postpandemic Implications. *J Aging Phys Act*  
41 2023;1(aop):1-9.

- 1 8. Gamble C, Van Haastregt J, Van Dam Van Isselt E, et al. Effectiveness of guided  
2 telerehabilitation on functional performance in community-dwelling older adults: A  
3 systematic review. *Clin Rehabil* 2024;38(4):457-77. doi:  
4 10.1177/02692155231217411
- 5 9. Costa RRG, Dorneles JR, Veloso JH, et al. Synchronous and asynchronous tele-exercise  
6 during the coronavirus disease 2019 pandemic: Comparisons of implementation and  
7 training load in individuals with spinal cord injury. *J Telemed Telecare*  
8 2023;29(4):308-17. doi: 10.1177/1357633x20982732
- 9 10. Chan JKY, Klainin-Yobas P, Chi Y, et al. The effectiveness of e-interventions on fall,  
10 neuromuscular functions and quality of life in community-dwelling older adults: A  
11 systematic review and meta-analysis. *Int J Nurs Stud* 2021;113:103784. doi:  
12 <https://doi.org/10.1016/j.ijnurstu.2020.103784>
- 13 11. Granet J, Peyrusqué E, Ruiz F, et al. Online physical exercise intervention in older adults  
14 during lockdown: Can we improve the recipe? *Aging Clin Exp Res* 2023;35(3):551-  
15 60. doi: 10.1007/s40520-022-02329-z
- 16 12. Zengin Alpozgen A, Kardes K, Acikbas E, et al. The effectiveness of synchronous tele-  
17 exercise to maintain the physical fitness, quality of life, and mood of older people-a  
18 randomized and controlled study. *Eur Geriatr Med* 2022;13(5):1177-85.
- 19 13. Wu G, Keyes L, Callas P, et al. Comparison of telecommunication, community, and home-  
20 based Tai Chi exercise programs on compliance and effectiveness in elders at risk for  
21 falls. *Arch Phys Med Rehabil* 2010;91(6):849-56.
- 22 14. Hong J, Kong H-J, Yoon H-J. Web-Based Telepresence Exercise Program for Community-  
23 Dwelling Elderly Women With a High Risk of Falling: Randomized Controlled Trial.  
24 *JMIR mHealth and uHealth* 2018;6(5):e132. doi: 10.2196/mhealth.9563
- 25 15. Bernocchi P, Giordano A, Pintavalle G, et al. Feasibility and clinical efficacy of a  
26 multidisciplinary home-telehealth program to prevent falls in older adults: a  
27 randomized controlled trial. *J Am Med Dir Assoc* 2019;20(3):340-46.
- 28 16. Yi D, Yim J. Remote home-based exercise program to improve the mental state, balance,  
29 and physical function and prevent falls in adults aged 65 years and older during the  
30 COVID-19 pandemic in Seoul, Korea. *Med Sci Monit* 2021;27:e935496-1.
- 31 17. Light K, Bishop M, Wright T. Telephone calls make a difference in home balance training  
32 outcomes: a randomized trial. *J Geriatr Phys Ther* 2016;39(3):97-101.
- 33 18. Sterne JA, Savović J, Page MJ, et al. RoB 2: a revised tool for assessing risk of bias in  
34 randomised trials. *BMJ* 2019;366
- 35 19. Chan KOW, Yuen PP, Fong BYF, et al. Effectiveness of telehealth in preventive care: a  
36 study protocol for a randomised controlled trial of tele-exercise programme involving  
37 older people with possible sarcopenia or at risk of fall. *BMC Geriatr* 2023;23(1):845.  
38 doi: 10.1186/s12877-023-04535-4
- 39 20. Schulz KF, Altman DG, Moher D. CONSORT 2010 statement: updated guidelines for  
40 reporting parallel group randomised trials. *J Pharmacol Pharmacother*  
41 2010;1(2):100-07.
- 42 21. Benavent-Caballer V, Rosado-Calatayud P, Segura-Ortí E, et al. The effectiveness of a  
43 video-supported group-based Otago exercise programme on physical performance in  
44 community-dwelling older adults: a preliminary study. *Physiotherapy*  
45 2016;102(3):280-86. doi: <https://doi.org/10.1016/j.physio.2015.08.002>
- 46 22. Nyman SR, Victor CR. Older people's participation in and engagement with falls  
47 prevention interventions in community settings: an augment to the cochrane  
48 systematic review. *Age Ageing* 2011;41(1):16-23. doi: 10.1093/ageing/afr103
- 49 23. Campbell A, Robertson MC. Otago exercise programme to prevent falls in older adults.  
50 *Wellington: ACC Thinksafe* 2003
- 51 24. Tombaugh TN, McIntyre NJ. The mini-mental state examination: a comprehensive  
52 review. *J Am Geriatr Soc* 1992;40(9):922-35.
- 53 25. Ngai S, Cheung R, Lam P, et al. Validation and reliability of the Physical Activity Scale  
54 for the Elderly in Chinese population. *J Rehabil Med* 2012;44(5):462-65. doi:  
55 10.2340/16501977-0953



- 1 26. Kwan MMS, Tsang WWN, Close JCT, Lord SR. Development and validation of a  
2 Chinese version of the Falls Efficacy Scale International. *Arch Gerontol Geriatr*  
3 2013;56(1):169-74. doi: <https://doi.org/10.1016/j.archger.2012.10.007>
- 4 27. Chen L-K, Woo J, Assantachai P, et al. Asian Working Group for Sarcopenia: 2019  
5 consensus update on sarcopenia diagnosis and treatment. *J Am Med Dir Assoc*  
6 2020;21(3):300-07. e2.
- 7 28. Chung P-K, Leung K-M. Psychometric properties of eight-item physical activity  
8 enjoyment scale in a Chinese population. *J Aging Phys Act* 2019;27(1):61-66.
- 9 29. White IR, Horton NJ, Carpenter J, Pocock SJ. Strategy for intention to treat analysis in  
10 randomised trials with missing outcome data. *BMJ* 2011;342
- 11 30. Garrard L, Boyle DK, Simon M, et al. Reliability and validity of the NDNQI® injury falls  
12 measure. *West J Nurs Res* 2016;38(1):111-28.
- 13 31. Martins AC, Santos C, Silva C, et al. Does modified Otago Exercise Program improves  
14 balance in older people? A systematic review. *Prev Med Rep* 2018;11:231-39. doi:  
15 <https://doi.org/10.1016/j.pmedr.2018.06.015>
- 16 32. Wu S, Guo Y, Cao Z, et al. Effects of Otago exercise program on physical function in  
17 older adults: A systematic review and meta-analysis of randomized controlled trials.  
18 *Arch Gerontol Geriatr* 2024;124:105470. doi:  
19 <https://doi.org/10.1016/j.archger.2024.105470>
- 20 33. Hager A-GM, Mathieu N, Lenoble-Hoskovec C, et al. Effects of three home-based  
21 exercise programmes regarding falls, quality of life and exercise-adherence in older  
22 adults at risk of falling: protocol for a randomized controlled trial. *BMC Geriatr*  
23 2019;19(1):1-11.
- 24 34. Picorelli AMA, Pereira LSM, Pereira DS, et al. Adherence to exercise programs for older  
25 people is influenced by program characteristics and personal factors: a systematic  
26 review. *J Physiother* 2014;60(3):151-56. doi:  
27 <https://doi.org/10.1016/j.jphys.2014.06.012>
- 28 35. Farrance C, Tsofliou F, Clark C. Adherence to community based group exercise  
29 interventions for older people: A mixed-methods systematic review. *Prev Med*  
30 2016;87:155-66.
- 31 36. Martel D, Lauzé M, Agnoux A, et al. Comparing the effects of a home-based exercise  
32 program using a gerontechnology to a community-based group exercise program on  
33 functional capacities in older adults after a minor injury. *Exp Gerontol* 2018;108:41-  
34 47. doi: <https://doi.org/10.1016/j.exger.2018.03.016>
- 35 37. Brustio PR, Klonova A, Rudi D, et al. Effects of online and face-to-face exercise training  
36 compared in healthy older adults: a feasibility study. *Sport Sci Health* 2024 doi:  
37 10.1007/s11332-024-01166-z
- 38 38. Schwartz H, Har-Nir I, Wenhoda T, Halperin I. Staying physically active during the  
39 COVID-19 quarantine: exploring the feasibility of live, online, group training  
40 sessions among older adults. *Transl Behav Med* 2021;11(2):314-22. doi:  
41 10.1093/tbm/ibaa141
- 42 39. Dawson R, Oliveira JS, Kwok WS, et al. Exercise Interventions Delivered Through  
43 Telehealth to Improve Physical Functioning for Older Adults with Frailty, Cognitive,  
44 or Mobility Disability: A Systematic Review and Meta-Analysis. *Telemedicine and e-  
45 Health* 2023
- 46 40. Gell N, Hoffman E, Patel K. Technology Support Challenges and Recommendations for  
47 Adapting an Evidence-Based Exercise Program for Remote Delivery to Older Adults:  
48 Exploratory Mixed Methods Study. *JMIR Aging* 2021;4(4):e27645. doi:  
49 10.2196/27645
- 50 41. García-Gollarte F, Mora-Concepción A, Pinazo-Hernandis S, et al. Effectiveness of a  
51 Supervised Group-Based Otago Exercise Program on Functional Performance in Frail  
52 Institutionalized Older Adults: A Multicenter Randomized Controlled Trial. *J Geriatr  
53 Phys Ther* 2023;46(1)

- 1 42. Liew LK, Tan MP, Tan PJ, et al. The Modified Otago exercises prevent grip strength  
2 deterioration among older fallers in the Malaysian falls assessment and intervention  
3 trial (MyFAIT). *J Geriatr Phys Ther* 2019;42(3):123-29.
- 4 43. Fisher J, Steele J, McKinnon P, McKinnon S. Strength Gains as a Result of Brief,  
5 Infrequent Resistance Exercise in Older Adults. *J Sports Med* 2014;2014:1-7. doi:  
6 10.1155/2014/731890
- 7 44. Duckham RL, Masud T, Taylor R, et al. Randomised controlled trial of the effectiveness  
8 of community group and home-based falls prevention exercise programmes on bone  
9 health in older people: the ProAct65+ bone study. *Age Ageing* 2015;44(4):573-79.  
10 doi: 10.1093/ageing/afv055
- 11 45. Hong J, Kim J, Kim SW, Kong H-J. Effects of home-based tele-exercise on sarcopenia  
12 among community-dwelling elderly adults: Body composition and functional fitness.  
13 *Exp Gerontol* 2017;87:33-39. doi: <https://doi.org/10.1016/j.exger.2016.11.002>
- 14 46. Robinson SM, Reginster JY, Rizzoli R, et al. Does nutrition play a role in the prevention  
15 and management of sarcopenia? *Clin Nutr* 2018;37(4):1121-32. doi:  
16 <https://doi.org/10.1016/j.clnu.2017.08.016>
- 17 47. Beauchamp MR, Hulteen RM, Ruissen GR, et al. Online-Delivered Group and Personal  
18 Exercise Programs to Support Low Active Older Adults' Mental Health During the  
19 COVID-19 Pandemic: Randomized Controlled Trial. *J Med Internet Res*  
20 2021;23(7):e30709. doi: 10.2196/30709
- 21 48. Hinman RS, Campbell PK, Kimp AJ, et al. Telerehabilitation consultations with a  
22 physiotherapist for chronic knee pain versus in-person consultations in Australia: the  
23 PEAK non-inferiority randomised controlled trial. *The Lancet*  
24 2024;403(10433):1267-78.
- 25 49. Census and Statistics Department HKSAR. 2021 Population Census - Main Results. In:  
26 Census and Statistics Department, ed. Hong Kong, 2022.
- 27 50. World Health Organization. Physical activity 2020 [Available from:  
28 <https://www.who.int/news-room/fact-sheets/detail/physical-activity> accessed 23 Nov  
29 2022.
- 30
